# Supplementary material
Source: PubMed Central journal article supplement (PMC3627465)
Supplement: NIHMS52274-supplement-01.pdf [file NIHMS52274-supplement-01.pdf]

**10 bp sequences suitable for 'barcoding' splinkerette products for 454 sequencing**

AGCCTAAGCT AGCTTAGGCT DNA barcode design is described in Parameswaran et al.,  
AGTTCAAGTC AGTCCAGGTC Nucleic Acids Res. 2007;35(19):e130

ACTTGAAC TG ACTGGACCTG  
ACGGTAAC TG ACGTTACCGT  
ATCCGAATCG ATCGGATTCG  
ATGGCAATGC ATGCCATTGC  
CAGGTCCAGT CAGTTCAAAGT  
CATTGCCATG CATGGCAAATG  
CTAAGCCTAG CTAGGCTTAG  
CGAATCCGAT CGATTCCGGAT  
TCAAGTTAGC TAGCCTAAGC  
TACCGTTACG TACGGTAACG  
TGAAC TTGAC TGACCTGGAC  
TAGGCTTCAG TCAGGTCCAG  
AGCCTCCAGT AGCTTCTTAG  
AGCCTGGCAT AGCTTGCCAT  
AGTTCGGACT AGTCCGAACT  
AGTTC TTGAC AGTCCCTCAG  
ACGGTCCATG ACGTTCAAATG  
ACTTG TTCAG ACTGGTGGAC  
ACTTGCCGAT ACTGGCCGGAT  
ACGGTGGATC ACGTTGAATC  
ATCCGCCTAG ATCGGCAAAGT  
ATCCGTTAGC ATCGGTAAGC  
ATGGCGGTAC ATGCCGTTAC  
ATGGCTTACG ATGCCTAACG  
CAGGTAAGTC CAGTTAGGTC  
CAGGTGGCAT CAGTTGCCAT  
CATTGAAGCT CATGGAGGCT  
CTAAGTTCAG CTAGGTCCAG  
CTAAGAACGT CTAGGACCGT  
CTGGATTGAC CTGAATGGAC  
CATTGTTAGC CATGGTAAGC  
CTGGAGGACT CTGAAGAACT  
CGAATAACTG CGATTACCTG  
CGAATGGATC CGATTGAATC  
CGTTAGGTAC CGTAAGTTAC  
CGTTATTACG CGTAATAACG  
TAGGCAAGCT TAGCCAGGCT  
TACCGCCATG TACGGCAAATG  
TACCGAAGTC TACGGAGGTC  
TGAACGGCAT TGACCGCCAT  
TGAACAATCG TGACCATTCTG  
TGCCACCGAT TGCAACGGAT  
TGCCAGGACT TGCAAGAACT  
TCGGACCTAG TCGAACTTAG  
TCAAGCCAGT TCAGGCAAAGT  
TCAAGAATGC TCAGGATTGC  
CTGGACCTGA CTGAACTTGA  
CGTTACCGTA CGTAACGGTA  
TGCCATTGCA TGCAATGGCA  
TCGGATTCGA TCGAATCCGA  
AGCCTGGCTA AGCTTGCCCTA  
AGCCTCCTGA AGCTTCTTGA  
ACTTG TTCGA ACTGGTCCGA  
ATCCGCCGTA ATCGGCCGGTA  
ATCCG TTCGA ATCGGTCCGA  
ATGGCGGTCA ATGCCGTTCA  
CAGGTGGCTA CAGTTGCCTA  
CTAAGTTGCA CTAGGTGGCA  
CGTTAGGTCA CGTAAGTTCA  
TCGGACCGTA TCGAACGGTA  
TCAAGCCTGA TCAGGCTTGA  
TGCCAGGTCA TGCAAGTTCA

Roche/454 have a set of 153 Barcodes which can be obtained from them.
